# Supplementary material for: Stretch-Induced Tenomodulin Expression Promotes Tenocyte Migration via F-Actin and Chromatin Remodeling
Source: MDPI journal article supplement (doi:10.3390/ijms22094928), 2021-05-06
Supplement: s1 [file s1]

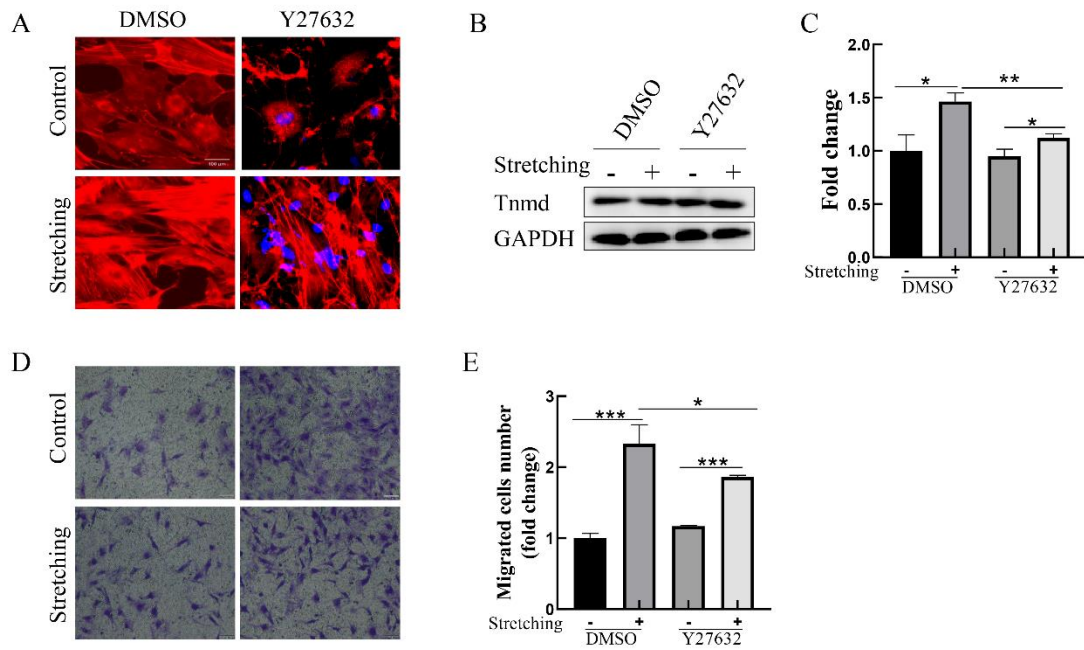

**Figure S1.** Effect of actin stress fibers inhibitor on stretching-increased Tnmd expression and tenocyte migration. (A) The F-actin organization was detected via phalloidin staining (scale bar, 100  $\mu$ m). (B) Western blotting was used to analyze the expression of Tnmd protein. (C) Quantification of the Tnmd expression. (D) Migratory tenocytes were detected by a Transwell assay (scar bar, 100  $\mu$ m). (E) The migration was counted and quantized. The graph shows the mean with SD; n = 3, \* p < 0.05; \*\* p < 0.01; \*\*\* p < 0.001.

**Table 1.** The list of primers

| Target genes | Name    | Primer sequences (5'-3') |
|--------------|---------|--------------------------|
| <b>Tnmd</b>  | Forward | GTGGTCCCACAAGTGAAGGT     |
|              | Reverse | GTCTTCTCGCTTGCTTGTC      |
| <b>GAPDH</b> | Forward | GCAAGTTCAACGGCACAGTCA    |
|              | Reverse | CACCCCATTTGATGTTAGCGG    |

**Table 2.** The list of shRNA

| Target genes | Name                  | sequences (5'-3')                                               |
|--------------|-----------------------|-----------------------------------------------------------------|
| <b>Tnmd</b>  | Tnmd-shRNA1 sense     | CCGGCGGATACACTGGCATCTACTT<br>CTCGAGAAGTAGATGCCAGTGTATCCGTTTTTTG |
|              | Tnmd-shRNA1 antisense | AATTCAAAAACGGATACACTGGCAT<br>CTACTTCTCGAGAAGTAGATGCCAGTGTATCCG  |
|              | Tnmd-shRNA2 sense     | CCGGGAGAGGTTACTGTTGTATTTACT<br>CGAGTAAATACAACAGTAACCTCTCTTTTTG  |
|              |                       |                                                                 |

|                |                         |                                 |
|----------------|-------------------------|---------------------------------|
| <b>Control</b> | Tnmd-shRNA2 antisense   | AATTCAAAAAGAGAGGTTACTGTTGTA     |
|                |                         | TTTACTCGAGTAAATACAACAGTAACCTCTC |
|                | control-shRNA sense     | CCGGCCTAAGGTTAAGTCGCCCTCGCTCG   |
|                |                         | AGCGAGGGCGACTTAACCTTAGGTTTTTG   |
|                | control-shRNA antisense | AATTCAAAAACCTAAGGTTAAGTCGCCC    |
|                |                         | TCGCTCGAGCGAGGGCGACTTAACCTTAGG  |
